# Supplementary material for: Fabrication and characterization of glucose-oxidase–trehalase electrode based on nanomaterial-coated carbon paper
Source: Royal Society of Chemistry journal article supplement (doi:10.1039/d3ra01554h), 2023-01-01
Supplement: d3ra01554h1.pdf [file d3ra01554h1.pdf]

## **Fabrication and characterization of glucose-oxidase-trehalase electrode based on nanomaterial-coated carbon paper**

Yanqing Zhang<sup>†a</sup>, Varshini Selvarajan<sup>†a</sup>, Ke Shi<sup>a</sup> and Chang-Joon Kim<sup>\*a, b</sup>

<sup>a</sup>Department of Chemical Engineering and RIGET, Gyeongsang National University, Jinju, Republic of Korea

<sup>b</sup>Department of Materials Engineering and Convergence Technology, Gyeongsang National University, 501, Jinju-daero, Jinju, Gyeongnam 52828, Republic of Korea

\* Corresponding author at: 501 Jinju-daero, Jinju, Gyeongnam 660-701, Republic of Korea

*E-mail address:* cj\_kim@gnu.ac.kr

<sup>†</sup> Yanqing Zhang<sup>a</sup> and Varshini Selvarajan<sup>a</sup> contributed equally to this work

### Electrochemical analyses of GOx electrodes

The electrochemical behaviors of three electrodes, namely CP/GOx-Gel, CP-SWCNT/GOx-Gel, and CP-SWCNT-AuNP<sub>10</sub>/GOx-Gel, were investigated using cyclic voltammetry. The electrochemical cell consisted of a three-electrode system with a working electrode, a counter electrode (Pt), and an Ag/AgCl reference electrode (LF-2, Innovative Instruments Inc., Tampa, FL, USA).

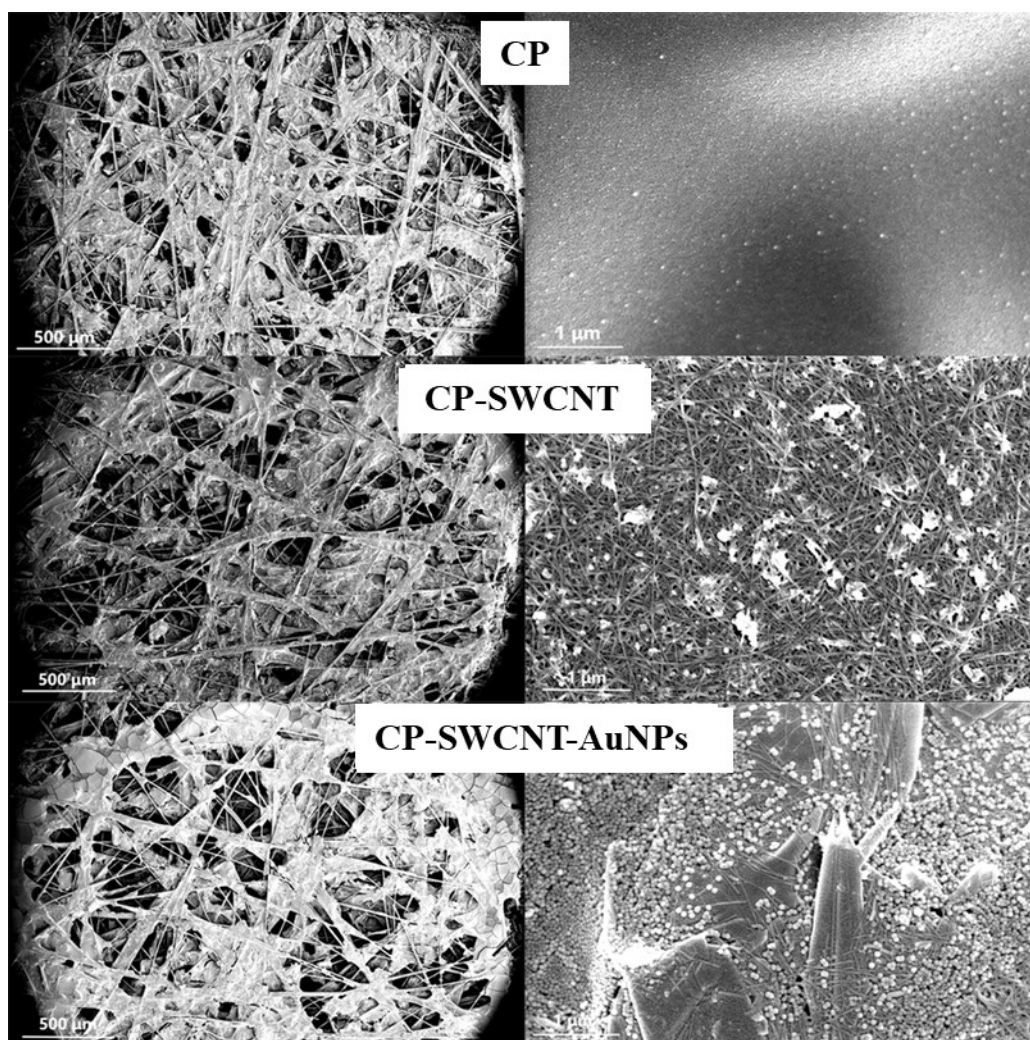

**Fig. S1.** SEM images of the CP, CP-SWCNT, and CP-SWCNT- AuNP<sub>10</sub>.

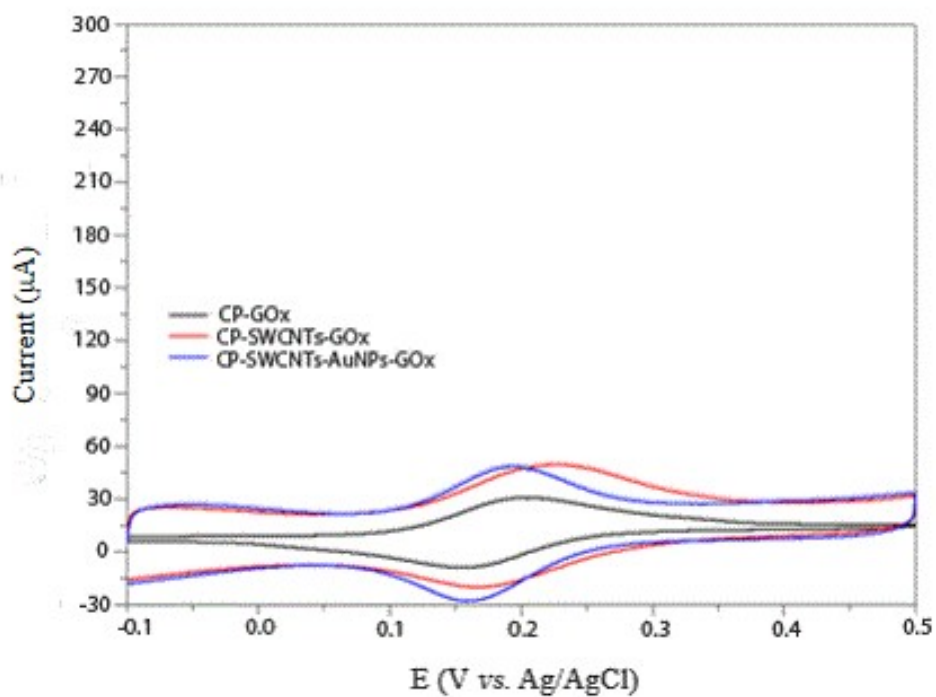

**Fig. S2.** Cyclic voltammograms of the CP/GOx-Gel, CP-SWCNT/GOx-Gel, and CP-SWCNT-AuNP<sub>10</sub>/GOx-Gel electrodes in 10 mM PBS (pH = 7.0) containing 1 mM ferrocenemethanol.

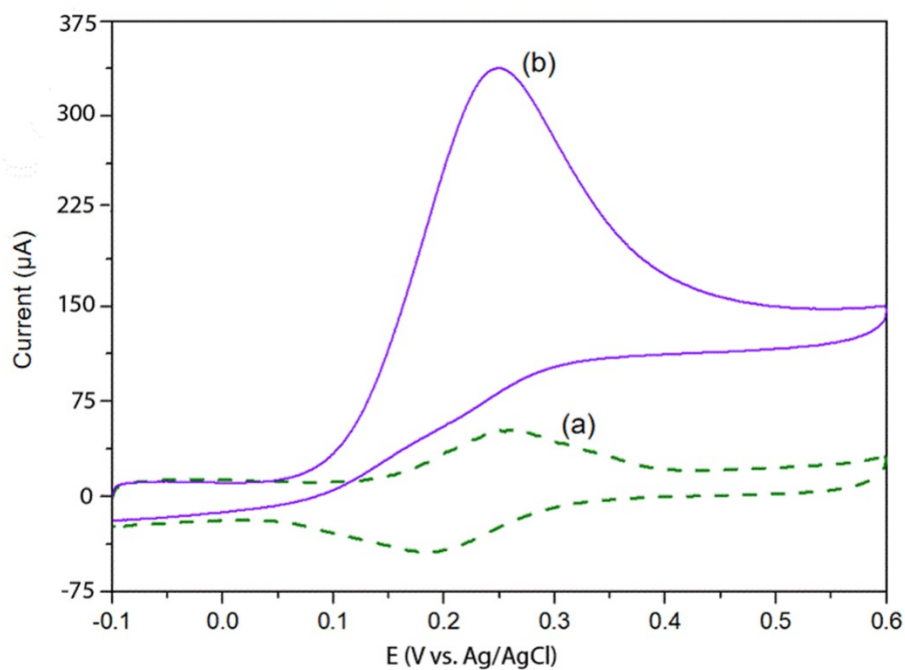

**Fig. S3.** Cyclic voltammograms of the CP-SWCNT-AuNP<sub>10</sub>/GOx-Gel electrode in the (a) electrolyte and (b) TREH-digested electrolyte. The electrolyte was prepared by dissolving ferrocenemethanol (1 mM) and trehalose (30 mM) in 10 mM PBS (pH = 7.0). To digest trehalose, the electrolyte was supplemented with TREH (2.1 U) and incubated at 37 °C for 3 h. The TREH was then inactivated by boiling the electrolyte at 90 °C for 5 min and cooling.
